# Supplementary material for: Ash leachates from some recent eruptions of Mount Etna (Italy) and Popocatépetl (Mexico) volcanoes and their impact on amphibian living freshwater organisms
Source: Copernicus journal article supplement (doi:10.5194/bg-12-7087-2015), 2015-12-08
Supplement: Supplementary file 1 [file bg-12-7087-2015-supplement.zip]

Table S5 – Saturation index for different compounds in mQ water leachates. The data was modelled using Visual Minteq software.

| Mineral phase                                             | E2011-1 mm<br>Sat. index | E2011-0.5 mm<br>Sat. index | E2011-0.25 mm<br>Sat. index | E2012-1 mm<br>Sat. index | Popo2012-0.125 mm<br>Sat. index | Popo2012-0.063 mm<br>Sat. index |
|-----------------------------------------------------------|--------------------------|----------------------------|-----------------------------|--------------------------|---------------------------------|---------------------------------|
| Aragonite                                                 | -4,67                    | -4,50                      | -4,34                       | -3,68                    | <b>-0,57</b>                    | -7,65                           |
| Artinite                                                  | -14,69                   | -14,23                     | -14,18                      | -12,75                   | -6,50                           | -20,68                          |
| Brucite                                                   | -8,86                    | -8,63                      | -8,61                       | -7,89                    | -4,77                           | -11,86                          |
| CaCO <sub>3</sub> xH <sub>2</sub> O(s)                    | -5,86                    | -5,69                      | -5,53                       | -4,87                    | -1,76                           | -8,85                           |
| Calcite                                                   | -4,53                    | -4,36                      | -4,20                       | -3,54                    | <b>-0,43</b>                    | -7,51                           |
| Chalcedony                                                | <b>-0,39</b>             | <b>-0,44</b>               | <b>-0,58</b>                | <b>-0,62</b>             | <b>-0,97</b>                    | <b>-0,88</b>                    |
| Chrysotile                                                | -15,35                   | -14,77                     | -14,97                      | -12,91                   | -4,23                           | -25,33                          |
| Cristobalite                                              | <b>-0,59</b>             | <b>-0,64</b>               | <b>-0,78</b>                | <b>-0,82</b>             | -1,17                           | -1,08                           |
| Dolomite (disordered)                                     | -9,80                    | -9,39                      | -9,21                       | -7,84                    | -1,60                           | -15,78                          |
| Dolomite (ordered)                                        | -9,25                    | -8,84                      | -8,66                       | -7,29                    | -1,05                           | -15,23                          |
| Epsomite                                                  | -6,15                    | -5,90                      | -5,38                       | -5,93                    | -5,61                           | -3,35                           |
| Fe(OH) <sub>2</sub> (am)                                  | -6,35                    | -6,59                      | -6,39                       | -5,92                    | -3,29                           | -9,84                           |
| Fe(OH) <sub>2</sub> (c)                                   | -5,75                    | -5,99                      | -5,79                       | -5,32                    | -2,69                           | -9,24                           |
| Fluorite                                                  | <b>0,34</b>              | <b>0,24</b>                | <b>0,47</b>                 | <b>-0,18</b>             | -1,16                           | <b>0,25</b>                     |
| Greenalite                                                | -7,27                    | -8,08                      | -7,77                       | -6,44                    | <b>0,76</b>                     | -18,73                          |
| Gypsum                                                    | -3,34                    | -3,15                      | -2,50                       | -3,10                    | -2,79                           | <b>-0,53</b>                    |
| Halite                                                    | -9,14                    | -9,11                      | -8,68                       | -8,70                    | -9,02                           | -7,78                           |
| Huntite                                                   | -23,02                   | -22,16                     | -21,94                      | -19,13                   | -6,64                           | -35,00                          |
| Hydromagnesite                                            | -36,31                   | -35,15                     | -35,04                      | -31,47                   | -15,84                          | -51,29                          |
| KCl(s)                                                    | -9,28                    | -9,12                      | -8,77                       | -8,11                    | -9,00                           | -8,48                           |
| Lime                                                      | -24,14                   | -23,97                     | -23,81                      | -23,15                   | -20,04                          | -27,12                          |
| Magnesite                                                 | -5,87                    | -5,64                      | -5,62                       | -4,90                    | -1,77                           | -8,87                           |
| Melanterite                                               | -7,17                    | -7,38                      | -6,69                       | -7,49                    | -7,66                           | -4,86                           |
| Mg(OH) <sub>2</sub> (active)                              | -10,55                   | -10,32                     | -10,30                      | -9,59                    | -6,46                           | -13,55                          |
| Mg <sub>2</sub> (OH) <sub>3</sub> Cl·4H <sub>2</sub> O(s) | -19,76                   | -19,30                     | -19,17                      | -17,76                   | -12,98                          | -23,13                          |
| MgCO <sub>3</sub> ·5H <sub>2</sub> O(s)                   | -8,79                    | -8,56                      | -8,54                       | -7,82                    | -4,69                           | -11,79                          |
| MgF <sub>2</sub> (s)                                      | -1,91                    | -1,96                      | -1,86                       | -2,46                    | -3,42                           | -2,01                           |
| Mirabilite                                                | -10,10                   | -10,01                     | -8,83                       | -10,09                   | -10,59                          | -6,83                           |
| MnCl <sub>2</sub> ·4H <sub>2</sub> O(s)                   | -16,50                   | -16,43                     | -16,03                      | -15,70                   | -16,80                          | -14,48                          |
| MnCO <sub>3</sub> (am)                                    | -4,37                    | -4,30                      | -4,08                       | -3,70                    | -1,86                           | -7,60                           |
| MnSO <sub>4</sub> (s)                                     | -12,40                   | -12,31                     | -11,59                      | -12,48                   | -13,44                          | -9,83                           |
| NaF(s)                                                    | -5,99                    | -6,09                      | -5,71                       | -6,37                    | -7,26                           | -5,81                           |
| Natron                                                    | -14,96                   | -14,88                     | -14,20                      | -14,19                   | -11,90                          | -17,48                          |
| Nesquehonite                                              | -8,66                    | -8,43                      | -8,41                       | -7,69                    | -4,56                           | -11,66                          |
| Periclase                                                 | -13,34                   | -13,11                     | -13,09                      | -12,38                   | -9,25                           | -16,34                          |
| Portlandite                                               | -14,14                   | -13,97                     | -13,81                      | -13,15                   | -10,04                          | -17,13                          |
| Pyrochroite                                               | -8,50                    | -8,42                      | -8,20                       | -7,82                    | -5,98                           | -11,72                          |
| Quartz                                                    | <b>0,07</b>              | <b>0,01</b>                | <b>-0,13</b>                | <b>-0,17</b>             | <b>-0,52</b>                    | <b>-0,43</b>                    |
| Rhodochrosite                                             | -3,87                    | -3,80                      | -3,58                       | -3,20                    | -1,36                           | -7,10                           |
| Sepiolite                                                 | -11,08                   | -10,79                     | -11,15                      | -9,85                    | -4,63                           | -18,57                          |
| Sepiolite (A)                                             | -14,10                   | -13,81                     | -14,17                      | -12,87                   | -7,65                           | -21,59                          |
| Siderite                                                  | -3,84                    | -4,07                      | -3,88                       | -3,41                    | <b>-0,78</b>                    | -7,33                           |
| SiO <sub>2</sub> (am,gel)                                 | -1,23                    | -1,28                      | -1,42                       | -1,46                    | -1,81                           | -1,72                           |
| SiO <sub>2</sub> (am,ppt)                                 | -1,20                    | -1,25                      | -1,39                       | -1,43                    | -1,78                           | -1,69                           |
| Thenardite                                                | -11,54                   | -11,44                     | -10,26                      | -11,52                   | -12,03                          | -8,26                           |
| Thermonatrite                                             | -16,91                   | -16,83                     | -16,15                      | -16,14                   | -13,85                          | -19,43                          |
| Vaterite                                                  | -5,09                    | -4,92                      | -4,77                       | -4,10                    | <b>-0,99</b>                    | -8,08                           |
