# Supplementary material for: Ash leachates from some recent eruptions of Mount Etna (Italy) and Popocatépetl (Mexico) volcanoes and their impact on amphibian living freshwater organisms
Source: Copernicus journal article supplement (doi:10.5194/bg-12-7087-2015), 2015-12-08
Supplement: Supplementary file 2 [file bg-12-7087-2015-supplement.zip]

Table S4 - Mole balance of leachate compounds to form different salts. In bold are the residuals for each compound after possible reactions.

| Sample             | time  | F     | Cl    | SO4   | Na    | K     | Mg    | Ca    | anions | cations | difference | NaCl  | Na remn. | Cl remn. | NaF   | Na remn. | F remn. | KF    | K remn.      | F remn. | CaSO4 | Ca remn. | SO4 remn. | MgSO4 | Mg remn. | SO4 remn. | CaF2         | Ca remn.     | F remn. | MgF2         | Mg remn.     | F remn.      | Na2SO4 | Na remn. | SO4 remn. | K2SO4 | K remn. | SO4 remn. |   |
|--------------------|-------|-------|-------|-------|-------|-------|-------|-------|--------|---------|------------|-------|----------|----------|-------|----------|---------|-------|--------------|---------|-------|----------|-----------|-------|----------|-----------|--------------|--------------|---------|--------------|--------------|--------------|--------|----------|-----------|-------|---------|-----------|---|
| E1208/2011-0.025mm | 1.8   | 1.121 | 0.131 | 0.874 | 0.698 | 0.243 | 0.227 | 0.644 | 2.999  | 2.784   | -0.216     | 0.131 | 0.566    | 0        | 0.566 | 0        | 0.554   | 0.243 | 0            | 0.312   | 0.544 | 0        | 0.229     | 0.229 | 0.048    | 0         | -            | 0            | 0.312   | 0.048        | 0            | <b>0.216</b> | -      | 0        | -         | 0     | 0       | 0         |   |
| E1208/2011-0.125mm | 3.6   | 1.098 | 0.114 | 0.705 | 0.640 | 0.216 | 0.261 | 0.595 | 2.622  | 2.568   | -0.054     | 0.114 | 0.526    | 0        | 0.526 | 0        | 0.571   | 0.216 | 0            | 0.110   | 0.110 | 0.150    | 0         | -     | 0        | -         | 0            | 0.355        | 0.150   | 0            | <b>0.054</b> | -            | 0      | -        | 0         | 0     | 0       |           |   |
| E1208/2011-0.25mm  | 10.8  | 1.084 | 0.120 | 0.791 | 0.582 | 0.225 | 0.269 | 0.666 | 2.787  | 2.676   | -0.110     | 0.120 | 0.462    | 0        | 0.462 | 0        | 0.622   | 0.225 | 0            | 0.398   | 0.666 | 0        | 0.126     | 0.126 | 0.144    | 0         | -            | 0            | 0.398   | 0.144        | 0            | <b>0.010</b> | -      | 0        | -         | 0     | 0       | 0         |   |
| E1208/2011-0.5mm   | 21.6  | 1.049 | 0.111 | 0.730 | 0.640 | 0.216 | 0.272 | 0.621 | 2.622  | 2.648   | 0.026      | 0.111 | 0.534    | 0        | 0.534 | 0        | 0.575   | 0.216 | 0            | 0.301   | 0.621 | 0        | 0.116     | 0.116 | 0.163    | 0         | -            | 0            | 0.301   | 0.163        | 0            | <b>0.013</b> | -      | 0        | -         | 0     | 0       | 0         |   |
| E1208/2011-0.75mm  | 43.2  | 1.106 | 0.113 | 0.848 | 0.544 | 0.262 | 0.330 | 0.766 | 3.116  | 3.088   | -0.028     | 0.113 | 0.531    | 0        | 0.531 | 0        | 0.575   | 0.252 | 0            | 0.324   | 0.766 | 0        | 0.162     | 0.162 | 0.148    | 0         | -            | 0            | 0.324   | 0.148        | 0            | <b>0.028</b> | -      | 0        | -         | 0     | 0       | 0         |   |
| E1208/2011-0.95mm  | 86.4  | 1.125 | 0.183 | 0.857 | 0.700 | 0.252 | 0.328 | 0.834 | 3.022  | 3.277   | 0.255      | 0.183 | 0.517    | 0        | 0.517 | 0        | 0.608   | 0.252 | 0            | 0.356   | 0.834 | 0        | 0.023     | 0.023 | 0.305    | 0         | -            | 0            | 0.356   | 0.178        | <b>0.125</b> | 0            | -      | 0        | -         | 0     | 0       | 0         |   |
| mean               |       |       |       |       |       |       |       |       |        |         |            | 0.123 | 0.523    | 0        | 0.524 | 0        | 0.588   | 0.234 | 0            | 0.330   | 0.688 | 0        | 0.130     | 0.130 | 0.158    | 0         | -            | 0            | 0.330   | 0.158        | 0            | <b>0.045</b> | -      | 0        | -         | 0     | 0       | 0         |   |
| st. dev.           |       |       |       |       |       |       |       |       |        |         |            | 0.027 | 0.034    | 0        | 0.017 | 0        | 0.093   | 0.093 | 0            | 0.071   | 0.093 | 0        | 0.071     | 0.071 | 0.045    | 0         | -            | 0            | 0.071   | 0.045        | 0            | -            | 0      | -        | 0         | -     | 0       | 0         | 0 |
| E1208/2011-0.50 mm | 1.8   | 0.825 | 0.093 | 0.185 | 0.292 | 0.128 | 0.259 | 0.480 | 1.288  | 1.900   | 0.612      | 0.093 | 0.199    | 0        | 0.199 | 0        | 0.626   | 0.128 | 0            | 0.498   | 0.185 | 0.296    | 0         | -     | -        | 0         | 0.249        | <b>0.046</b> | 0       | -            | <b>0.299</b> | 0            | -      | 0        | 0         | -     | 0       | 0         |   |
| E1208/2011-0.50 mm | 3.6   | 0.876 | 0.105 | 0.193 | 0.275 | 0.117 | 0.267 | 0.500 | 1.367  | 1.925   | 0.558      | 0.105 | 0.169    | 0        | 0.169 | 0        | 0.707   | 0.117 | 0            | 0.580   | 0.193 | 0.307    | 0         | -     | -        | 0         | 0.295        | <b>0.012</b> | 0       | -            | <b>0.297</b> | 0            | -      | 0        | 0         | -     | 0       | 0         |   |
| E1208/2011-0.50 mm | 10.8  | 0.871 | 0.111 | 0.242 | 0.341 | 0.134 | 0.283 | 0.491 | 1.467  | 2.023   | 0.567      | 0.111 | 0.242    | 0        | 0.242 | 0        | 0.641   | 0.134 | 0            | 0.597   | 0.242 | 0.249    | 0         | -     | -        | 0         | 0.249        | <b>0</b>     | 0.010   | 0.005        | <b>0.278</b> | 0            | -      | 0        | 0         | -     | 0       | 0         |   |
| E1208/2011-0.50 mm | 21.6  | 0.926 | 0.086 | 0.213 | 0.311 | 0.128 | 0.297 | 0.500 | 1.437  | 2.033   | 0.597      | 0.086 | 0.225    | 0        | 0.225 | 0        | 0.701   | 0.128 | 0            | 0.573   | 0.213 | 0.287    | 0         | -     | -        | 0         | 0.286        | <b>0.001</b> | 0       | -            | <b>0.297</b> | 0.001        | -      | 0        | 0         | -     | 0       | 0         |   |
| E1208/2011-0.50 mm | 43.2  | 0.905 | 0.082 | 0.196 | 0.313 | 0.131 | 0.304 | 0.516 | 1.378  | 2.083   | 0.705      | 0.082 | 0.231    | 0        | 0.231 | 0        | 0.673   | 0.131 | 0            | 0.542   | 0.196 | 0.320    | 0         | -     | -        | 0         | 0.271        | <b>0.049</b> | 0       | -            | <b>0.304</b> | 0.049        | -      | 0        | 0         | -     | 0       | 0         |   |
| E1208/2011-0.50 mm | 86.4  | 0.914 | 0.094 | 0.195 | 0.327 | 0.136 | 0.311 | 0.521 | 1.397  | 2.127   | 0.730      | 0.094 | 0.233    | 0        | 0.233 | 0        | 0.681   | 0.136 | 0            | 0.545   | 0.195 | 0.326    | 0         | -     | -        | 0         | 0.272        | <b>0.063</b> | 0       | -            | <b>0.311</b> | 0.0          | -      | 0        | 0         | -     | 0       | 0         |   |
| E1208/2011-0.50 mm | 209.2 | 0.849 | 0.107 | 0.215 | 0.344 | 0.147 | 0.337 | 0.981 | 1.486  | 2.345   | 0.859      | 0.107 | 0.237    | 0        | 0.237 | 0        | 0.712   | 0.147 | 0            | 0.685   | 0.215 | 0.375    | 0         | -     | -        | 0         | 0.262        | <b>0.093</b> | 0       | -            | <b>0.337</b> | 0.0          | -      | 0        | 0         | -     | 0       | 0         |   |
| E1208/2011-0.50 mm | 432   | 0.947 | 0.093 | 0.205 | 0.350 | 0.151 | 0.343 | 0.592 | 1.450  | 2.371   | 0.921      | 0.093 | 0.257    | 0        | 0.257 | 0        | 0.690   | 0.151 | 0            | 0.539   | 0.205 | 0.387    | 0         | -     | -        | 0         | 0.270        | <b>0.118</b> | 0       | -            | <b>0.343</b> | 0.0          | -      | 0        | 0         | -     | 0       | 0         |   |
| E1208/2011-0.50 mm | 604.8 | 0.845 | 0.079 | 0.195 | 0.355 | 0.155 | 0.349 | 0.584 | 1.414  | 2.397   | 0.984      | 0.079 | 0.277    | 0        | 0.277 | 0        | 0.669   | 0.155 | 0            | 0.514   | 0.195 | 0.399    | 0         | -     | -        | 0         | 0.257        | <b>0.142</b> | 0       | -            | <b>0.349</b> | 0.0          | -      | 0        | 0         | -     | 0       | 0         |   |
| mean               |       |       |       |       |       |       |       |       |        |         |            | 0.090 | 0.229    | 0        | 0.229 | 0        | 0.624   | 0.136 | 0            | 0.524   | 0.204 | 0.387    | 0         | -     | -        | 0         | 0.259        | <b>0.050</b> | 0       | -            | <b>0.349</b> | 0.0          | -      | 0        | 0         | -     | 0       | 0         |   |
| st. dev.           |       |       |       |       |       |       |       |       |        |         |            | 0.010 | 0.031    | 0        | 0.012 | 0        | 0.017   | 0.017 | 0            | 0.017   | 0.017 | 0.017    | 0         | -     | -        | 0         | 0.031        | <b>0.005</b> | 0       | -            | <b>0.005</b> | 0.005        | -      | 0        | 0         | -     | 0       | 0         |   |
| E1208/2011-1 mm    | 1.8   | 1.035 | 0.084 | 0.149 | 0.293 | 0.095 | 0.190 | 0.393 | 1.418  | 1.905   | 0.095      | 0.084 | 0.208    | 0        | 0.208 | 0        | 0.607   | 0.095 | 0            | 0.741   | 0.149 | 0.234    | 0         | -     | -        | 0         | 0.234        | 0            | 0.274   | 0.137        | <b>0.043</b> | 0            | -      | 0        | 0         | -     | 0       | 0         |   |
| E1208/2011-1 mm    | 3.6   | 1.068 | 0.085 | 0.162 | 0.345 | 0.094 | 0.195 | 0.422 | 1.478  | 1.673   | 0.195      | 0.085 | 0.260    | 0        | 0.260 | 0        | 0.608   | 0.094 | 0            | 0.714   | 0.162 | 0.259    | 0         | -     | -        | 0         | 0.259        | 0            | 0.196   | 0.098        | <b>0.098</b> | 0            | -      | 0        | 0         | -     | 0       | 0         |   |
| E1208/2011-1 mm    | 10.8  | 1.095 | 0.083 | 0.148 | 0.297 | 0.088 | 0.201 | 0.397 | 1.474  | 1.582   | 0.108      | 0.083 | 0.214    | 0        | 0.214 | 0        | 0.681   | 0.088 | 0            | 0.793   | 0.148 | 0.249    | 0         | -     | -        | 0         | 0.249        | 0            | 0.295   | 0.147        | <b>0.054</b> | 0            | -      | 0        | 0         | -     | 0       | 0         |   |
| E1208/2011-1 mm    | 21.6  | 1.097 | 0.080 | 0.151 | 0.321 | 0.102 | 0.215 | 0.423 | 1.478  | 1.700   | 0.221      | 0.080 | 0.241    | 0        | 0.241 | 0        | 0.656   | 0.102 | 0            | 0.754   | 0.151 | 0.273    | 0         | -     | -        | 0         | 0.273        | 0            | 0.239   | 0.104        | <b>0.111</b> | 0            | -      | 0        | 0         | -     | 0       | 0         |   |
| E1208/2011-1 mm    | 43.2  | 1.115 | 0.084 | 0.152 | 0.308 | 0.104 | 0.222 | 0.440 | 1.504  | 1.796   | 0.292      | 0.084 | 0.244    | 0        | 0.244 | 0        | 0.671   | 0.104 | 0            | 0.767   | 0.152 | 0.287    | 0         | -     | -        | 0         | 0.287        | 0            | 0.192   | 0.096        | <b>0.126</b> | 0            | -      | 0        | 0         | -     | 0       | 0         |   |
| E1208/2011-1 mm    | 86.4  | 1.133 | 0.088 | 0.154 | 0.336 | 0.107 | 0.229 | 0.456 | 1.529  | 1.812   | 0.292      | 0.088 | 0.248    | 0        | 0.248 | 0        | 0.686   | 0.107 | 0            | 0.779   | 0.154 | 0.302    | 0         | -     | -        | 0         | 0.302        | 0            | 0.176   | 0.088        | <b>0.141</b> | 0            | -      | 0        | 0         | -     | 0       | 0         |   |
| E1208/2011-1 mm    | 209.2 | 1.122 | 0.084 | 0.144 | 0.331 | 0.114 | 0.255 | 0.470 | 1.495  | 1.895   | 0.401      | 0.084 | 0.247    | 0        | 0.247 | 0        | 0.675   | 0.114 | 0            | 0.781   | 0.144 | 0.326    | 0         | -     | -        | 0         | 0.326        | 0            | 0.110   | 0.055        | <b>0.200</b> | 0            | -      | 0        | 0         | -     | 0       | 0         |   |
| E1208/2011-1 mm    | 432   | 1.123 | 0.085 | 0.155 | 0.352 | 0.125 | 0.269 | 0.469 | 1.518  | 2.013   | 0.495      | 0.085 | 0.267    | 0        | 0.267 | 0        | 0.656   | 0.125 | 0            | 0.731   | 0.155 | 0.344    | 0         | -     | -        | 0         | 0.344        | 0            | 0.043   | 0.021        | <b>0.247</b> | 0            | -      | 0        | 0         | -     | 0       | 0         |   |
| E1208/2011-1 mm    | 604.8 | 1.124 | 0.086 | 0.166 | 0.373 | 0.135 | 0.282 | 0.529 | 1.541  | 2.130   | 0.589      | 0.086 | 0.287    | 0        | 0.287 | 0        | 0.637   | 0.135 | 0            | 0.701   | 0.166 | 0.363    | 0         | -     | -        | 0         | 0.351        | <b>0.012</b> | 0       | -            | <b>0.282</b> | 0            | -      | 0        | 0         | -     | 0       | 0         |   |
| mean               |       |       |       |       |       |       |       |       |        |         |            | 0.085 | 0.246    | 0        | 0.246 | 0        | 0.664   | 0.114 | 0            | 0.744   | 0.149 | 0.234    | 0         | -     | -        | 0         | 0.234        | 0            | 0.274   | 0.137        | <b>0.043</b> | 0            | -      | 0        | 0         | -     | 0       | 0         |   |
| st. dev.           |       |       |       |       |       |       |       |       |        |         |            | 0.003 | 0.046    | 0        | 0.024 | 0        | 0.016   | 0.016 | 0            | 0.042   | 0.149 | 0.234    | 0         | -     | -        | 0         | 0.042        | 0            | 0.047   | 0.047        | <b>0.047</b> | 0.047        | -      | 0        | 0         | -     | 0       | 0         |   |
| E2404/2012-1 mm    | 1.8   | 0.500 | 0.201 | 0.074 | 0.261 | 0.450 | 0.308 | 0.425 | 0.849  | 1.978   | 1.129      | 0.201 | 0.060    | 0        | 0.060 | 0        | 0.440   | 0.440 | <b>0.010</b> | 0       | 0.074 | 0.351    | 0         | -     | -        | 0         | -            | <b>0.351</b> | 0       | -            | <b>0.208</b> | 0            | -      | 0        | 0         | -     | 0       | 0         |   |
| E2404/2012-1 mm    | 3.6   | 0.476 | 0.213 | 0.091 | 0.261 | 0.475 | 0.298 | 0.450 | 0.872  | 2.003   | 1.181      | 0.213 | 0.048    | 0        | 0.048 | 0        | 0.429   | 0.429 | <b>0.046</b> | 0       | 0.091 | 0.359    | 0         | -     | -        | 0         | -            | <b>0.359</b> | 0       | -            | <b>0.208</b> | 0            | -      | 0        | 0         | -     | 0       | 0         |   |
| E2404/2012-1 mm    | 10.8  | 0.500 | 0.204 | n.a.  | 0.272 | 0.475 | 0.229 | 0.488 | -      | 2.180   | -          | 0.204 | 0.068    | 0        | 0.068 | 0        | 0.432   | 0.432 | <b>0.043</b> | 0       | 0.204 | 0.359    | 0         | -     | -        | 0         | -            | -            | -       | -            | -            | -            | -      | -        | -         | -     | -       | -         |   |
| E2404/2012-1 mm    | 21.6  | 0.523 | 0.195 | n.a.  | 0.283 | 0.475 | 0.250 | 0.525 | -      | 2.308   | -          | 0.195 | 0.088    | 0        | 0.088 | 0        | 0.436   | 0.436 | <b>0.039</b> | 0       | 0.195 | 0.359    | 0         | -     | -        | 0         | -            | -            | -       | -            | -            | -            | -      | -        | -         | -     | -       | -         |   |
| E2404/2012-1 mm    | 43.2  | 0.575 | 0.188 | 0.075 | 0.239 | 0.450 | 0.250 | 0.525 | 0.915  | 2.329   | 1.324      | 0.188 | 0.051    | 0        | 0.051 | 0        | 0.524   | 0.524 | 0            | 0.074   | 0.076 | 0.449    | 0         | -     | -        | 0.037     | <b>0.412</b> | -            | -       | <b>0.250</b> | 0            | -            | 0      | 0        | -         | 0     | 0       |           |   |
| E2404/2012-1 mm    | 86.4  | 0.556 | 0.193 | 0.072 | 0.261 | 0.475 | 0.250 | 0.500 | 0.894  | 2.235   | 1.342      | 0.193 | 0.067    | 0        | 0.067 | 0        | 0.488   | 0.488 | 0            | 0.013   | 0.072 | 0.428    | 0         | -     | -        | 0.007     | <b>0.421</b> | -            | -       | <b>0.250</b> | 0            | -            | 0      | 0        | -         | 0     | 0       |           |   |
| E2404/2012-1 mm    | 209.2 | 0.603 | 0.216 | 0.083 | 0.326 | 0.500 | 0.250 | 0.525 | 0.984  | 3.259   | 2.275      | 0.216 | 0.110    | 0        | 0.    |          |         |       |              |         |       |          |           |       |          |           |              |              |         |              |              |              |        |          |           |       |         |           |   |
