# Supplementary material for: Ash leachates from some recent eruptions of Mount Etna (Italy) and Popocatépetl (Mexico) volcanoes and their impact on amphibian living freshwater organisms
Source: Copernicus journal article supplement (doi:10.5194/bg-12-7087-2015), 2015-12-08
Supplement: Supplementary file 3 [file bg-12-7087-2015-supplement.zip]

Table S2 - EDS glass analyses of major elements for Etna 2011, Etna 2012 and Popocatépetl 2012 samples.

| <b>Etna 12/08/2011</b>   |                  |                  |                                |                    |      |      |      |                   |                  |                               |      |        |             |             |
|--------------------------|------------------|------------------|--------------------------------|--------------------|------|------|------|-------------------|------------------|-------------------------------|------|--------|-------------|-------------|
| sample                   | SiO <sub>2</sub> | TiO <sub>2</sub> | Al <sub>2</sub> O <sub>3</sub> | FeO <sub>tot</sub> | MnO  | MgO  | CaO  | Na <sub>2</sub> O | K <sub>2</sub> O | P <sub>2</sub> O <sub>5</sub> | Cl   | Total  | Tot. alkali | Akali ratio |
| 1                        | 51,41            | 1,96             | 16,80                          | 10,10              | 0,16 | 3,60 | 7,39 | 4,64              | 3,42             | 0,39                          | 0,13 | 100,00 | 8,06        | 0,74        |
| 2                        | 51,54            | 1,99             | 17,05                          | 9,79               | 0,16 | 3,48 | 7,53 | 4,73              | 3,25             | 0,35                          | 0,14 | 100,01 | 7,98        | 0,69        |
| 3                        | 51,32            | 1,96             | 17,32                          | 9,95               | 0,25 | 3,73 | 7,23 | 4,81              | 3,03             | 0,31                          | 0,10 | 100,01 | 7,84        | 0,63        |
| 4                        | 51,22            | 2,15             | 16,83                          | 10,26              | 0,23 | 3,45 | 7,67 | 4,35              | 3,32             | 0,36                          | 0,16 | 100,00 | 7,67        | 0,76        |
| 5                        | 51,73            | 1,93             | 17,23                          | 9,44               | 0,21 | 3,64 | 7,39 | 4,71              | 3,19             | 0,38                          | 0,16 | 100,01 | 7,90        | 0,68        |
| 6                        | 51,44            | 2,04             | 16,47                          | 10,57              | 0,27 | 3,56 | 7,63 | 4,17              | 3,34             | 0,49                          | 0,00 | 99,98  | 7,51        | 0,80        |
| 7                        | 51,25            | 2,14             | 17,24                          | 9,51               | 0,33 | 3,61 | 7,47 | 4,74              | 3,30             | 0,32                          | 0,08 | 99,99  | 8,04        | 0,70        |
| 8                        | 51,50            | 1,95             | 17,19                          | 9,24               | 0,16 | 3,48 | 7,28 | 5,28              | 3,47             | 0,34                          | 0,10 | 99,99  | 8,75        | 0,66        |
| 9                        | 51,47            | 2,06             | 16,75                          | 10,06              | 0,21 | 3,67 | 7,36 | 4,57              | 3,37             | 0,33                          | 0,14 | 99,99  | 7,94        | 0,74        |
| 10                       | 51,38            | 2,03             | 17,04                          | 9,68               | 0,22 | 3,66 | 7,50 | 4,54              | 3,31             | 0,51                          | 0,13 | 100,00 | 7,85        | 0,73        |
| <b>Etna 24/04/2012</b>   |                  |                  |                                |                    |      |      |      |                   |                  |                               |      |        |             |             |
| sample                   | SiO <sub>2</sub> | TiO <sub>2</sub> | Al <sub>2</sub> O <sub>3</sub> | FeO <sub>tot</sub> | MnO  | MgO  | CaO  | Na <sub>2</sub> O | K <sub>2</sub> O | P <sub>2</sub> O <sub>5</sub> | Cl   | Total  | Tot. alkali | Akali ratio |
| 1                        | 49,18            | 1,76             | 18,00                          | 9,30               | 0,15 | 3,93 | 9,72 | 4,64              | 2,67             | 0,50                          | 0,13 | 99,98  | 7,31        | 0,58        |
| 2                        | 50,02            | 2,07             | 17,05                          | 10,47              | 0,10 | 3,95 | 8,37 | 4,32              | 3,05             | 0,47                          | 0,14 | 100,01 | 7,37        | 0,71        |
| 3                        | 50,94            | 2,07             | 17,06                          | 9,95               | 0,28 | 3,68 | 8,05 | 4,49              | 2,95             | 0,36                          | 0,16 | 99,99  | 7,44        | 0,66        |
| 4                        | 50,62            | 2,11             | 16,78                          | 10,29              | 0,25 | 3,93 | 8,05 | 4,41              | 3,08             | 0,30                          | 0,17 | 99,99  | 7,49        | 0,70        |
| 5                        | 50,20            | 1,96             | 17,28                          | 9,88               | 0,22 | 4,12 | 8,11 | 4,64              | 3,00             | 0,41                          | 0,16 | 99,98  | 7,64        | 0,65        |
| 6                        | 50,45            | 2,20             | 16,73                          | 10,31              | 0,28 | 3,91 | 7,90 | 4,61              | 3,16             | 0,32                          | 0,13 | 100,00 | 7,77        | 0,69        |
| 7                        | 50,55            | 2,13             | 17,10                          | 9,96               | 0,24 | 3,82 | 8,11 | 4,44              | 3,07             | 0,41                          | 0,17 | 100,00 | 7,51        | 0,69        |
| 8                        | 50,31            | 2,12             | 16,96                          | 10,15              | 0,28 | 4,12 | 7,97 | 4,68              | 3,01             | 0,29                          | 0,12 | 100,01 | 7,69        | 0,64        |
| 9                        | 49,94            | 2,14             | 16,84                          | 10,66              | 0,31 | 3,87 | 8,30 | 4,40              | 3,10             | 0,31                          | 0,14 | 100,01 | 7,50        | 0,70        |
| <b>Popocatépetl 2012</b> |                  |                  |                                |                    |      |      |      |                   |                  |                               |      |        |             |             |
| sample                   | SiO <sub>2</sub> | TiO <sub>2</sub> | Al <sub>2</sub> O <sub>3</sub> | FeO <sub>tot</sub> | MnO  | MgO  | CaO  | Na <sub>2</sub> O | K <sub>2</sub> O | P <sub>2</sub> O <sub>5</sub> | Cl   | Total  | Tot. alkali | Akali ratio |
| 1                        | 72,94            | 0,94             | 13,22                          | 3,13               | 0,00 | 0,60 | 1,38 | 3,80              | 3,92             | 0,00                          | 0,05 | 99,98  | 7,72        | 1,03        |
| 2                        | 63,88            | 1,46             | 16,53                          | 5,76               | 0,13 | 1,61 | 3,96 | 3,96              | 2,71             | 0,00                          | 0,00 | 100,00 | 6,67        | 0,68        |
| 3                        | 60,76            | 0,97             | 19,93                          | 4,33               | 0,05 | 1,49 | 6,05 | 4,72              | 1,72             | 0,00                          | 0,00 | 100,02 | 6,44        | 0,36        |
| 4                        | 72,08            | 0,84             | 14,22                          | 2,72               | 0,09 | 0,49 | 1,63 | 4,52              | 3,39             | 0,00                          | 0,00 | 99,98  | 7,91        | 0,75        |
| 5                        | 70,39            | 0,96             | 14,87                          | 3,42               | 0,00 | 0,81 | 2,37 | 3,91              | 3,22             | 0,00                          | 0,05 | 100,00 | 7,13        | 0,82        |
| 6                        | 66,54            | 1,23             | 16,01                          | 4,42               | 0,06 | 1,16 | 3,63 | 4,29              | 2,61             | 0,00                          | 0,06 | 100,01 | 6,90        | 0,61        |
| 7                        | 69,06            | 1,17             | 14,75                          | 4,13               | 0,18 | 1,19 | 2,80 | 3,52              | 3,14             | 0,00                          | 0,06 | 100,00 | 6,66        | 0,89        |
