# Supplementary material for: Ash leachates from some recent eruptions of Mount Etna (Italy) and Popocatépetl (Mexico) volcanoes and their impact on amphibian living freshwater organisms
Source: Copernicus journal article supplement (doi:10.5194/bg-12-7087-2015), 2015-12-08
Supplement: Supplementary file 4 [file bg-12-7087-2015-supplement.zip]

Table S1 – Bulk rock (XRF) analyses of major and selected trace elements for Etna 2011, Etna 2012, and Popocatépetl 2012 samples.

|                                | <b>Etna 12/08/2011</b> | <b>Etna 24/04/2012</b> | <b>Popo 2012</b> |
|--------------------------------|------------------------|------------------------|------------------|
| SiO <sub>2</sub>               | 47,62                  | 45,62                  | 61,66            |
| TiO <sub>2</sub>               | 1,86                   | 2,08                   | 0,86             |
| Al <sub>2</sub> O <sub>3</sub> | 18,07                  | 17,05                  | 17,14            |
| Fe <sub>2</sub> O <sub>3</sub> | 11,62                  | 13,21                  | 5,8              |
| MnO                            | 0,21                   | 0,23                   | 0,09             |
| MgO                            | 3,97                   | 4,35                   | 2,29             |
| CaO                            | 9,94                   | 10,99                  | 5,88             |
| Na <sub>2</sub> O              | 3,90                   | 3,62                   | 4,4              |
| K <sub>2</sub> O               | 2,36                   | 2,32                   | 1,73             |
| P <sub>2</sub> O <sub>5</sub>  | 0,45                   | 0,53                   | 0,15             |
| Rb                             | 63,40                  | 50,60                  | 45,10            |
| Sr                             | 1312,50                | 1303,50                | 478,50           |
| Y                              | 28,60                  | 26,60                  | 16,30            |
| Zr                             | 255,90                 | 235,90                 | 151,70           |
| Nb                             | 57,10                  | 52,10                  | 5,90             |
| LOI                            | 0,00                   | 0,00                   | 0,00             |
| Total                          | 100,00                 | 100,00                 | 100,00           |
| Tot. Alkali                    | 6,26                   | 5,94                   | 6,13             |
| Alkali ratio                   | 0,61                   | 0,64                   | 0,39             |
