# Supplementary material for: Ash leachates from some recent eruptions of Mount Etna (Italy) and Popocatépetl (Mexico) volcanoes and their impact on amphibian living freshwater organisms
Source: Copernicus journal article supplement (doi:10.5194/bg-12-7087-2015), 2015-12-08
Supplement: Supplementary file 5 [file bg-12-7087-2015-supplement.zip]

Table S7 – Drinking water limits and potential effects on water quality and consumer health.

| <b>Parameter</b>              | <b>maximum<br/>value</b> | <b>Unit</b> | <b>Potential effects (USEPA)</b>                          |
|-------------------------------|--------------------------|-------------|-----------------------------------------------------------|
| As                            | 10                       | µg/L        | skin damage, increased cancer risk                        |
| B                             | 1                        | mg/L        | many affect male reproductive tract                       |
| F                             | 1.5                      | mg/L        | dental and skeletal fluorosis                             |
| Hg                            | 1                        | µg/L        | kidney damage                                             |
| NO <sub>3</sub> <sup>-</sup>  | 50                       | mg/L        | blue-baby syndrome in infants                             |
| Cl                            | 250                      | mg/L        | salty taste                                               |
| Fe                            | 200                      | µg/L        | rusty colour, metallic taste, gastrointestinal irritation |
| Mn                            | 50                       | µg/L        | black colour, bitter metallic taste                       |
| SO <sub>4</sub> <sup>2-</sup> | 250                      | mg/L        | diarrhoea, gastrointestinal irritation, salty taste       |
| Na                            | 200                      | mg/L        | salty taste                                               |
