# Supplementary material for: Ash leachates from some recent eruptions of Mount Etna (Italy) and Popocatépetl (Mexico) volcanoes and their impact on amphibian living freshwater organisms
Source: Copernicus journal article supplement (doi:10.5194/bg-12-7087-2015), 2015-12-08
Supplement: Supplementary file 6 [file bg-12-7087-2015-supplement.zip]

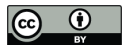

## *Supplement of*

# **Ash leachates from some recent eruptions of Mount Etna (Italy) and Popocatepetl (Mexico) volcanoes and their impact on amphibian living freshwater organisms**

**M. D'Addabbo et al.**

*Correspondence to:* R. Sulpizio (roberto.sulpizio@uniba.it)

- bg-12-7087-2015-supplement-title-page.pdf
- Supplementary data
  - Table S1 – Bulk rock.pdf
  - Table S2.pdf
  - Table S3 – EDS analyses of mineral phases for the Etna and Popocatepetl samples.pdf
  - Table S4.pdf
  - Table S5.pdf
  - Table S6.pdf
  - Table S7 – Drinking water limits and potential effects on water quality and consumer health.pdf
- \_MACOSX
  - Supplementary data
    - \* \_Table S1 – Bulk rock.pdf
    - \* \_Table S2.pdf
    - \* \_Table S3 – EDS analyses of mineral phases for the Etna and Popocatepetl samples.pdf
    - \* \_Table S4.pdf
    - \* \_Table S5.pdf
    - \* \_Table S6.pdf
    - \* \_Table S7 – Drinking water limits and potential effects on water quality and consumer health.pdf

The copyright of individual parts of the supplement might differ from the CC-BY 3.0 licence.
