# Supplementary material for: Ash leachates from some recent eruptions of Mount Etna (Italy) and Popocatépetl (Mexico) volcanoes and their impact on amphibian living freshwater organisms
Source: Copernicus journal article supplement (doi:10.5194/bg-12-7087-2015), 2015-12-08
Supplement: Supplementary file 7 [file bg-12-7087-2015-supplement.zip]

Table S3 – EDS analyses of mineral phases for the Etna and Popocatepetl samples. Phxst = phenocrystal; micr. = microlite; Dp = diopside; En = enstatite; Au = augite; Bw = bytownite; Lb = labradorite. Te = tephroite ; Fo = forsterite; Fa = fayalite; Wo = wollastonite; Fs = ferrosillite; Mg# = magnesium number; An = anortite; Ab = albite; Or = ortose.

| Olivine                        |        |        |        |        |       |        |        | Pyroxenes                      |       |       |       |                          |       |       |       |
|--------------------------------|--------|--------|--------|--------|-------|--------|--------|--------------------------------|-------|-------|-------|--------------------------|-------|-------|-------|
| <i>Etna2011</i>                |        |        |        |        |       |        |        | <i>Etna2011 Etna 2012</i>      |       |       |       | <i>Popocatepétl 2012</i> |       |       |       |
|                                | phxst. | phxst. | phxst. | phxst. | micr. | phxst. | phxst. | Dp                             | Dp    | En    | Au    | En                       | Au    | En    |       |
| SiO <sub>2</sub>               | 37,99  | 38,71  | 37,57  | 38,35  | 39,32 | 37,88  | 37,99  | SiO <sub>2</sub>               | 49,91 | 50,08 | 53,69 | 53,08                    | 53,66 | 52,82 | 55,41 |
| TiO <sub>2</sub>               | 0,08   | 0,08   | 0,21   | 0,06   | 0,24  | 0,11   | 0,00   | TiO <sub>2</sub>               | 1,55  | 1,31  | 0,26  | 0,88                     | 0,18  | 0,80  | 0,29  |
| Al <sub>2</sub> O <sub>3</sub> | 0,00   | 0,00   | 0,00   | 0,00   | 0,00  | 0,00   | 0,00   | Al <sub>2</sub> O <sub>3</sub> | 4,27  | 3,84  | 0,00  | 2,02                     | 0,00  | 1,19  | 0,24  |
| Fe <sub>tot</sub>              | 24,40  | 23,28  | 27,54  | 23,29  | 23,44 | 25,76  | 25,94  | Fe <sub>tot</sub>              | 8,44  | 7,31  | 20,89 | 13,56                    | 20,71 | 10,97 | 16,98 |
| MnO                            | 0,65   | 0,71   | 0,77   | 0,70   | 0,60  | 0,75   | 0,72   | MnO                            | 0,27  | 0,37  | 0,91  | 0,43                     | 0,65  | 0,51  | 0,55  |
| MgO                            | 36,42  | 36,83  | 33,23  | 37,21  | 35,02 | 35,02  | 34,78  | MgO                            | 13,18 | 14,07 | 22,22 | 15,87                    | 22,44 | 15,53 | 24,66 |
| CaO                            | 0,47   | 0,39   | 0,43   | 0,37   | 0,75  | 0,44   | 0,55   | CaO                            | 22,36 | 23,02 | 1,88  | 13,74                    | 2,05  | 18,18 | 1,69  |
| Te                             | 0,73   | 0,80   | 0,89   | 0,78   | 0,70  | 0,85   | 0,82   | Wo                             | 50,84 | 47,66 | 3,83  | 29,61                    | 4,54  | 37,60 | 3,43  |
| Fo                             | 71,67  | 72,82  | 67,23  | 73,05  | 71,40 | 69,74  | 69,37  | En                             | 29,97 | 40,53 | 62,97 | 47,59                    | 49,65 | 44,69 | 69,66 |
| Fa                             | 26,94  | 25,82  | 31,26  | 25,65  | 26,81 | 28,78  | 29,02  | Fs                             | 19,19 | 11,81 | 33,20 | 22,81                    | 45,82 | 17,71 | 26,90 |
| Ca-Ol                          | 0,66   | 0,55   | 0,63   | 0,52   | 1,10  | 0,63   | 0,79   | Mg #                           | 0,99  | 0,77  | 0,65  | 0,68                     | 0,85  | 0,72  | 0,72  |

| Plagioclase                    |                  |       |       |       |                  |       |       |       |                          |       |       |       |
|--------------------------------|------------------|-------|-------|-------|------------------|-------|-------|-------|--------------------------|-------|-------|-------|
|                                | <i>Etna 2011</i> |       |       |       | <i>Etna 2012</i> |       |       |       | <i>Popocatepétl 2012</i> |       |       |       |
|                                | Bw               | Bw    | Bw    | Bw    | Bw               | Bw    | Lb    | Lb    | Lb                       | Lb    | Lb    | Lb    |
| SiO <sub>2</sub>               | 46,44            | 46,19 | 45,63 | 45,88 | 49,29            | 49,61 | 51,87 | 55,21 | 55,40                    | 56,36 | 55,59 | 51,83 |
| Al <sub>2</sub> O <sub>3</sub> | 34,22            | 34,59 | 34,72 | 34,28 | 31,92            | 31,73 | 30,17 | 26,87 | 25,95                    | 25,91 | 27,60 | 30,72 |
| Fe <sub>tot</sub>              | 0,64             | 0,79  | 0,69  | 0,92  | 0,90             | 0,85  | 0,98  | 1,69  | 2,22                     | 1,84  | 0,87  | 0,62  |
| CaO                            | 16,54            | 16,80 | 17,08 | 16,63 | 14,17            | 14,07 | 12,12 | 10,04 | 9,53                     | 9,54  | 9,60  | 12,40 |
| Na <sub>2</sub> O              | 1,70             | 1,39  | 1,55  | 1,62  | 2,96             | 3,03  | 3,97  | 4,69  | 4,61                     | 4,84  | 5,31  | 3,80  |
| K <sub>2</sub> O               | 0,09             | 0,01  | 0,06  | 0,01  | 0,26             | 0,22  | 0,36  | 0,49  | 0,56                     | 0,48  | 0,38  | 0,06  |
| An                             | 83,86            | 86,92 | 85,59 | 84,96 | 71,44            | 71,01 | 61,42 | 52,54 | 51,40                    | 50,56 | 48,83 | 64,09 |
| Ab                             | 15,60            | 13,01 | 14,06 | 14,98 | 27,00            | 27,67 | 36,41 | 44,41 | 45,00                    | 46,42 | 48,87 | 35,54 |
| Or                             | 0,54             | 0,06  | 0,36  | 0,06  | 1,56             | 1,32  | 2,17  | 3,05  | 3,60                     | 3,03  | 2,30  | 0,37  |
