# Supplementary material for: Ash leachates from some recent eruptions of Mount Etna (Italy) and Popocatépetl (Mexico) volcanoes and their impact on amphibian living freshwater organisms
Source: Copernicus journal article supplement (doi:10.5194/bg-12-7087-2015), 2015-12-08
Supplement: Supplementary file 8 [file bg-12-7087-2015-supplement.zip]

Table S6 - Saturation index for different compounds in lake water leachates. The data was modelled using Visual Minteq software

| Mineral phase                                             | E2011-1 mm<br>Sat. index | E2011-0.5 mm<br>Sat. index | E2012-1 mm<br>Sat. index | E2012-0.5 mm<br>Sat. index | Popo2012-0.125 mm<br>Sat. index | Popo2012-0.063 mm<br>Sat. index |
|-----------------------------------------------------------|--------------------------|----------------------------|--------------------------|----------------------------|---------------------------------|---------------------------------|
| Aragonite                                                 | 0,18                     | 0,30                       | 0,50                     | 0,27                       | -6,84                           | -0,61                           |
| Artinite                                                  | -4,98                    | -4,74                      | -4,35                    | -4,80                      | -18,98                          | -6,48                           |
| Brucite                                                   | -4,01                    | -3,89                      | -3,69                    | -3,92                      | -11,00                          | -4,76                           |
| CaCO <sub>3</sub> xH <sub>2</sub> O(s)                    | -1,02                    | -0,89                      | -0,69                    | -0,92                      | -8,03                           | -1,80                           |
| Calcite                                                   | 0,32                     | 0,45                       | 0,64                     | 0,42                       | -6,69                           | -0,47                           |
| Chalcedony                                                | -0,46                    | -0,29                      | -0,48                    | -0,97                      | -0,60                           | -0,91                           |
| Chrysotile                                                | -0,94                    | -0,22                      | -0,03                    | -1,70                      | -22,22                          | -4,09                           |
| Cristobalite                                              | -0,66                    | -0,49                      | -0,68                    | -1,17                      | -0,80                           | -1,11                           |
| Dolomite (disordered)                                     | -0,10                    | 0,15                       | 0,55                     | 0,09                       | -14,11                          | -1,63                           |
| Dolomite (ordered)                                        | 0,45                     | 0,70                       | 1,10                     | 0,64                       | -13,56                          | -1,08                           |
| Epsomite                                                  | -5,39                    | -5,32                      | -5,61                    | -5,6                       | -3,68                           | -3,30                           |
| Fe(OH) <sub>2</sub> (am)                                  | -2,18                    | -1,84                      | -1,27                    | -2,46                      | -8,64                           | -3,41                           |
| Fe(OH) <sub>2</sub> (c)                                   | -1,58                    | -1,24                      | -0,67                    | -1,86                      | -8,04                           | -2,81                           |
| Fluorite                                                  | 0,49                     | 0,5                        | -0,53                    | -1,18                      | -0,38                           | -0,32                           |
| Greenalite                                                | 5,12                     | 6,48                       | 7,78                     | 3,24                       | -14,57                          | 0,49                            |
| Gypsum                                                    | -2,59                    | -2,51                      | -2,81                    | -2,81                      | -0,89                           | -0,54                           |
| Halite                                                    | -8,70                    | -8,71                      | -9                       | -9,02                      | -8,21                           | -7,67                           |
| Huntite                                                   | -3,62                    | -3,13                      | -2,34                    | -3,25                      | -31,63                          | -6,65                           |
| Hydromagnesite                                            | -12,04                   | -11,44                     | -10,45                   | -11,60                     | -47,03                          | -15,78                          |
| KCl(s)                                                    | -8,81                    | -8,81                      | -8,99                    | -9                         | -8,77                           | -8,31                           |
| Lime                                                      | -19,29                   | -19,16                     | -18,97                   | -19,19                     | -26,30                          | -20,08                          |
| Magnesite                                                 | -1,02                    | -0,89                      | -0,70                    | -0,93                      | -8,01                           | -1,76                           |
| Melanterite                                               | -7,08                    | -7                         | -6,72                    | -7,69                      | -4,84                           | -5,48                           |
| Mg(OH) <sub>2</sub> (active)                              | -5,70                    | -5,58                      | -5,38                    | -5,61                      | -12,70                          | -6,45                           |
| Mg <sub>2</sub> (OH) <sub>3</sub> Cl·4H <sub>2</sub> O(s) | -11,89                   | -11,71                     | -11,40                   | -11,72                     | -22,19                          | -12,34                          |
| MgCO <sub>3</sub> ·5H <sub>2</sub> O(s)                   | -3,94                    | -3,81                      | -3,62                    | -3,85                      | -10,93                          | -4,68                           |
| MgF <sub>2</sub> (s)                                      | -1,75                    | -1,76                      | -2,78                    | -3,43                      | -2,61                           | -2,52                           |
| Mirabilite                                                | -9,65                    | -9,58                      | -10,3                    | -10,60                     | -7,35                           | -6,84                           |
| MnCl <sub>2</sub> ·4H <sub>2</sub> O(s)                   | -16,32                   | -16,30                     | -16,60                   | -16,97                     | -15,34                          | -14,41                          |
| MnCO <sub>3</sub> (am)                                    | -0,52                    | -0,38                      | -0,51                    | -1,16                      | -6,93                           | -0,70                           |
| MnSO <sub>4</sub> (s)                                     | -12,64                   | -12,55                     | -13,17                   | -13,60                     | -10,34                          | -9,98                           |
| NaF(s)                                                    | -6,06                    | -6,07                      | -6,79                    | -7,26                      | -6,20                           | -6,09                           |
| Natron                                                    | -10,41                   | -10,30                     | -10,52                   | -11,0                      | -16,82                          | -10,44                          |
| Nesquehonite                                              | -3,81                    | -3,68                      | -3,49                    | -3,72                      | -10,80                          | -4,55                           |
| Periclase                                                 | -8,49                    | -8,37                      | -8,17                    | -8,40                      | -15,49                          | -9,24                           |
| Portlandite                                               | -9,30                    | -9,17                      | -8,97                    | -9,20                      | -16,31                          | -10,08                          |
| Pyrochroite                                               | -4,64                    | -4,50                      | -4,64                    | -5,28                      | -11,05                          | -4,83                           |
| Quartz                                                    | -0,01                    | 0,17                       | -0,03                    | -0,52                      | -0,15                           | -0,46                           |
| Rhodochrosite                                             | -0,02                    | 0,12                       | -0,01                    | -0,66                      | -6,43                           | -0,20                           |
| Sepiolite                                                 | -1,60                    | -0,83                      | -1,03                    | -2,97                      | -16,02                          | -4,46                           |
| Sepiolite (A)                                             | -4,62                    | -3,85                      | -4,05                    | -5,99                      | -19,04                          | -7,48                           |
| Siderite                                                  | 0,34                     | 0,67                       | 1,2                      | 0,05                       | -6,13                           | -0,90                           |
| SiO <sub>2</sub> (am,gel)                                 | -1,30                    | -1,13                      | -1,32                    | -1,81                      | -1,44                           | -1,75                           |
| SiO <sub>2</sub> (am,ppt)                                 | -1,27                    | -1,10                      | -1,29                    | -1,78                      | -1,41                           | -1,72                           |
| Thenardite                                                | -11,08                   | -11,0                      | -11,73                   | -12,03                     | -8,78                           | -8,27                           |
| Thermonatrite                                             | -12,36                   | -12,24                     | -12,47                   | -12,99                     | -18,77                          | -12,39                          |
| Vaterite                                                  | -0,25                    | -0,12                      | 0,08                     | -0,15                      | -7,26                           | -1,03                           |
